# Supplementary material
Source: Springer Nature journal article supplement (https://www.springermedizin.de/resource/supplementary/12874_2002_27_MOESM3_ESM.pdf/9433610)

### Separate 2- arm Trials

percent improvement

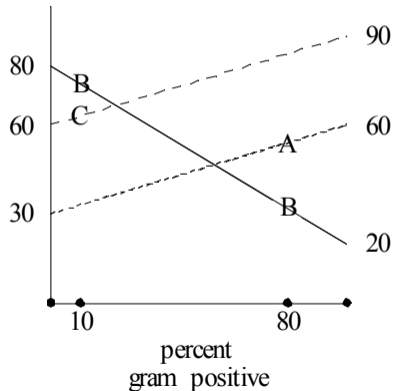

### Single 3- arm Trial

percent improvement

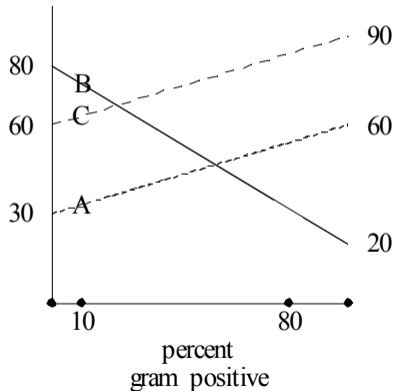

Supplement: MOESM3 [file 9433610]
